# Supplementary material for: Palliative care research promotion in policy and practice: a knowledge exchange process
Source: PubMed Central journal article supplement — BMJ Support Palliat Care. 2021 Aug 16;12(e3):e285–92. doi: 10.1136/bmjspcare-2021-003096 (PMC9380483; doi:10.1136/bmjspcare-2021-003096), 2021-08-16
Supplement: bmjspcare-2021-003096supp001.pdf [file bmjspcare-2021-003096supp001.pdf]

**Knowledge exchange evidence review group feedback**  
(Anonymous online survey circulated to evidence review group participants following the evidence review group and wider stakeholder event)

**Q1** How useful did you find being involved in the evidence review meeting(s) and/or knowledge exchange event? [*response scale from 'not useful' to 'very useful'*]

**Q2** How relevant did you find being involved in the evidence review meeting(s) and/or knowledge exchange event? [*response scale from 'not relevant' to 'very relevant'*]

**Q3** What did you like about the evidence review meeting(s) and/or knowledge exchange event? [*Open text box for responses*]

**Q4** What did you dislike about the evidence review meeting(s) and/or knowledge exchange event? [*Open text box for responses*]

**Q5** Has anything occurred as a result of your involvement in the evidence review meetings and knowledge exchange event? [*Open text box for responses*]

**Q6** Is there anything you will do as a result of your involvement in this process. [*Open text box for responses*]

**Q7** What areas would you like to see prioritised for future knowledge exchange activities? [*Open text box for responses*]

**Q8** How can we progress palliative care knowledge exchange in Scotland over the next 3 years? [*Open text box for responses*]

## **Knowledge exchange wider stakeholder event feedback questions** (anonymous paper-based feedback form circulated after the event)

**Q1** How useful did you find the event? [response scale from 'not at all useful' to 'very useful']

**Q2** How would you describe your main role? [response options: research user/producer/broker/other]

**Q3** What did you like about the event?

**Q4** What did you dislike about the event?

**Q5** Is there anything you will do in your place of work/study/life because of the event?

**Q6** What is the most important research finding that you heard today?

**Q7** How could we facilitate knowledge exchange and evidence informed decision-making in Scotland?

**Q8** What areas would you like to see priorities for future knowledge exchange events?
